# Supplementary material for: U6 snRNA Pseudogenes: Markers of Retrotransposition Dynamics in Mammals
Source: PubMed Central journal article supplement (PMC4476161; doi:10.1093/molbev/msv062), 2015-03-11

## Supplemental Data

**Supplemental Table 1: snRNA sequences associated with repeats.** Details of the 30 sequences that have been found associated with retrotransposons or processed pseudogenes. <sup>a</sup> enumeration and the type of the snRNA genomic copy. <sup>b</sup> nucleotide length of the associated repeat. <sup>c</sup> size of the TSD (“del” means a short deletion, “na” stands for not applicable). <sup>d</sup> first strand cleavage site based on the snRNA transcriptional orientation. <sup>e</sup> 3’ truncation position of the snRNA sequence. <sup>f</sup> number of nucleotide homologies at the junction between the snRNA and the flanking sequence for twin priming-like insertions. A\* indicates the presence of an extra A nucleotide between the U6atac and the *Alu* sequence. <sup>g</sup> specifies if the chimera with a repeat sequence originates from a template switching mechanism or a twin priming-like mechanism (twin). In parenthesis, for the latter, the cleavage site is provided in the repeat transcriptional orientation. For sequence number 5 and 16, details of the insertion site were built by comparing with other primate genomes (indicated in parenthesis).

**Supplemental Table 2: Fisher’s exact test.** This table displays the results of the Fisher’s exact test conducted between species used in this study. The species names are indicated both in abscissa and ordinate (row and column headers). Each cell contains the *p*-value of the Fisher’s exact test that has been calculated between the two species indicated in the column and row headers. The test is performed using two variables: (i) the structural group of the U6 snRNA sequences (Alone, Repeat, Poly(A), 3’trunc) and (ii) 2 genomes (among the 48 analysed). To make this table more readable, subgroups of cells corresponding to the same phylogenetic order have been colored (chiroptera in brown, carnivora in blue, artiodactyla in green, primates in red, rodentia in orange). Inside these sub-tables, cells with a *p*-value above

0.01, suggesting similar distribution of each groups of processed pseudogenes between the two genomes, are filled with lighter colors.

**Supplemental Table 3: Repeat content of genomes.** <sup>a</sup> and <sup>b</sup>, scientific and common names of the analysed genomes, respectively. <sup>c</sup> and <sup>d</sup>, genome size and coverage, respectively. <sup>e</sup> to <sup>i</sup>, estimated proportion of the genome for each category of repeated sequences: LINEs, SINEs, LTR retrotransposons (LTR retro.), DNA transposons (DNA trans.) and unclassified (others), respectively. <sup>j</sup> total percentage of the genome covered by repeated sequences. <sup>k</sup> N50 scaffold, \* a longer N50 usually indicates a more complete genome assembly. <sup>l</sup> total number of hits, found by BLAST search, with identity to U6 sequence. <sup>m</sup> number of hits that reach our selective criteria. <sup>n</sup> number of hits with gaps (non-assigned nucleotides). Details of the data provided from <sup>a</sup> to <sup>l</sup> are accessible on the *Ensembl* genome list browser (<http://www.ensembl.org/info/about/species.html>). nd is used for no data.

**Supplemental Figure 1: Illustration of the bioinformatic analysis using ProRNAScan.**

Panel A is a picture of the web interface of ProRNAScan. U6 snRNA sequence can be uploaded as an example but any small non-coding gene could be used for analysis. Genomes can be chosen from the list provided from *Ensembl*. Selective parameters are set by default but allow setting the minimum identity to the referring sequence, the minimal size of TSD and the minimal size of sequence homology. Panel B is a picture of the results obtained on the web interface. Depending on the results, a maximum of 9 files compiling the results can be downloaded. “Download result as fasta file” is a text file with all the retrieved snRNA sequences, their associated segment when applicable (repeat or poly(A)) and an extra 100 bp genomic DNA sequence upstream and downstream. “Download result as fasta file (Only To Check)” is a text file with all the sequences that need to be checked before being associated to

a particular group. “Download result as fasta file (Only Alone)”, “Download result as fasta file (Only Repeat)”, “Download result as fasta file (Only PolyA)”, “Download result as fasta file (Only 3' truncated)”, are text files with all sequences of each group separately. “Download result as tab file” is a text file with a description of all retrieved sequences, providing notably the genomic position of the identified sequence and the group it belongs to, the poly(A) position, sequence and size, the TSD position, sequence and size. “Download result as tab file (Only TSD)” is similar as the last file but contains only the results for sequences with TSD. Finally, “Download result as Excel file” is an excel file that summarizes all the results.

#### Additional references for Supplemental Table 2

- Alfoldi J, Di Palma F, Grabherr M, Williams C, Kong L, Mauceli E, Russell P, Lowe CB, Glor RE, Jaffe JD et al. 2011. The genome of the green anole lizard and a comparative analysis with birds and mammals. *Nature* **477**(7366): 587-591.
- Consortium CGS. 2004. Sequence and comparative analysis of the chicken genome provide unique perspectives on vertebrate evolution. *Nature* **432**(7018): 695-716.
- Dalloul RA, Long JA, Zimin AV, Aslam L, Beal K, Blomberg Le A, Bouffard P, Burt DW, Crasta O, Crooijmans RP et al. 2010. Multi-platform next-generation sequencing of the domestic turkey (*Meleagris gallopavo*): genome assembly and analysis. *PLoS Biol* **8**(9).
- Elsik CG Tellam RL Worley KC Gibbs RA Muzny DM Weinstock GM Adelson DL Eichler EE Elnitski L Guigo R et al. 2009. The genome sequence of taurine cattle: a window to ruminant biology and evolution. *Science* **324**(5926): 522-528.
- Fang X, Mou Y, Huang Z, Li Y, Han L, Zhang Y, Feng Y, Chen Y, Jiang X, Zhao W et al. 2012. The sequence and analysis of a Chinese pig genome. *Gigascience* **1**(1): 16.
- Gibbs RA Weinstock GM Metzker ML Muzny DM Sodergren EJ Scherer S Scott G Steffen D Worley KC Burch PE et al. 2004. Genome sequence of the Brown Norway rat yields insights into mammalian evolution. *Nature* **428**(6982): 493-521.
- Hellsten U, Harland RM, Gilchrist MJ, Hendrix D, Jurka J, Kapitonov V, Ovcharenko I, Putnam NH, Shu S, Taher L et al. 2010. The genome of the Western clawed frog *Xenopus tropicalis*. *Science* **328**(5978): 633-636.
- Lander ES Linton LM Birren B Nusbaum C Zody MC Baldwin J Devon K Dewar K Doyle M FitzHugh W et al. 2001. Initial sequencing and analysis of the human genome. *Nature* **409**(6822): 860-921.
- Lindblad-Toh K Wade CM Mikkelsen TS Karlsson EK Jaffe DB Kamal M Clamp M Chang JL Kulbokas EJ, 3rd Zody MC et al. 2005. Genome sequence, comparative analysis and haplotype structure of the domestic dog. *Nature* **438**(7069): 803-819.
- Mikkelsen TS, Wakefield MJ, Aken B, Amemiya CT, Chang JL, Duke S, Garber M, Gentles AJ, Goodstadt L, Heger A et al. 2007. Genome of the marsupial *Monodelphis domestica* reveals innovation in non-coding sequences. *Nature* **447**(7141): 167-177.

- Petersen JL, Mickelson JR, Rendahl AK, Valberg SJ, Andersson LS, Axelsson J, Bailey E, Bannasch D, Binns MM, Borges AS et al. 2013. Genome-wide analysis reveals selection for important traits in domestic horse breeds. *PLoS Genet* **9**(1): e1003211.
- Renfree MB Papenfuss AT Deakin JE Lindsay J Heider T Belov K Rens W Waters PD Pharo EA Shaw G et al. 2011. Genome sequence of an Australian kangaroo, *Macropus eugenii*, provides insight into the evolution of mammalian reproduction and development. *Genome Biol* **12**(8): R81.
- Warren WC, Clayton DF, Ellegren H, Arnold AP, Hillier LW, Kunstner A, Searle S, White S, Vilella AJ, Fairley S et al. 2010. The genome of a songbird. *Nature* **464**(7289): 757-762.
- Waterston RH Lindblad-Toh K Birney E Rogers J Abril JF Agarwal P Agarwala R Ainscough R Alexandersson M An P et al. 2002. Initial sequencing and comparative analysis of the mouse genome. *Nature* **420**(6915): 520-562.
- Whittington CM, Papenfuss AT, Locke DP, Mardis ER, Wilson RK, Abubucker S, Mitreva M, Wong ES, Hsu AL, Kuchel PW et al. 2010. Novel venom gene discovery in the platypus. *Genome Biol* **11**(9): R95.

| type <sup>a</sup>    | length <sup>b</sup> | TSD <sup>c</sup> | cleavage <sup>d</sup> | 3'truncation position <sup>e</sup> | junction <sup>f</sup> | remarks <sup>g</sup>                |
|----------------------|---------------------|------------------|-----------------------|------------------------------------|-----------------------|-------------------------------------|
| 1 U1_3'trunc-L1      | 623                 | 17               | CTTTC-TG              | 40                                 | 3                     | L1-twin (TTTCT-AT)                  |
| 2 U2_3'trunc-L1      | 1457                | 14               | TCAA-GA               | 55                                 | 2                     | L1-twin (CTTTT-AA)                  |
| 3 U5_3'trunc-L1      | 394                 | 20               | AGGTG-GA              | 36                                 | 1                     | L1-twin (TTTTTC-AG)                 |
| 4 U5_3'trunc-SVA     | 479                 | 15               | GTTAG-AA              | 48                                 | 4                     | SVA-twin (CTTTC-AA)                 |
| 5 U5_3'trunc-L1      | 700                 | 16               | GTTTT-CA              | 83                                 | na                    | U5-L1 (TSD from rhesus genome)      |
| 6 U5_3'trunc-L1      | 3712                | 15               | GAGGA-GC              | 43                                 | 1                     | L1-twin (TTTTA-AT)                  |
| 7 U5_3'trunc-L1      | 38                  | 17               | AGTTA-CA              | 46                                 | 5                     | L1-twin (TTTCT-AA)                  |
| 8 U5_3'trunc-L1      | 1084                | 8                | AGTTT-CT              | 78                                 | na                    | U5-L1                               |
| 9 U5_3'trunc-un.     | 29                  | 15               | TTTTT-AA              | 98                                 | na                    | U5-sequence unknown                 |
| 10 U6_3'trunc-L1     | 121                 | 7                | AAAGC-TC              | 68                                 | 2                     | L1-twin (TTTTT-AA)                  |
| 11 U6-L1             | 1365                | 19               | TTTTT-AA              | full length                        | na                    | U6-L1                               |
| 12 U6-L1             | 760                 | 15               | TTCTT-GA              | full length                        | na                    | U6-L1                               |
| 13 U6-L1             | 119                 | 16               | TCTTT-GC              | full length                        | na                    | U6-L1                               |
| 14 U6-L1             | 3464                | 14               | TCTTT-GA              | full length                        | na                    | U6-L1                               |
| 15 U6-L1             | 438                 | 13               | TTTTT-TT              | full length                        | na                    | U6-L1                               |
| 16 U6-L1             | 4416                | del              | TGTAA-AT              | full length                        | na                    | U6-L1 (del. from chimpanzee genome) |
| 17 U6-L1             | 4885                | 15               | TTCTT-AA              | full length                        | na                    | U6-L1                               |
| 18 U6-L1             | 1173                | 17               | ATTTT-AA              | full length                        | na                    | U6-L1                               |
| 19 U6-L1             | 595                 | 17               | TTTTA-AT              | full length                        | na                    | U6-L1                               |
| 20 U6-L1             | 1343                | 11               | TTCTT-AA              | full length                        | na                    | U6-L1                               |
| 21 U6-L1             | 1374                | 13               | TCTTT-AA              | full length                        | na                    | U6-L1                               |
| 22 U6-L1             | 2103                | 16               | TTTTT-AA              | full length                        | na                    | U6-L1                               |
| 23 U6-pseudogene     | 1314                | 15               | TTTTT-AA              | full length                        | na                    | U6-pseudo (ACAA2)                   |
| 24 U6atac-L1         | 383                 | 14               | GTTTT-AT              | full length                        | na                    | U6atac-L1                           |
| 25 U6atac_3'trunc-L1 | 268                 | 13               | GATTT-CA              | 80                                 | na                    | U6atac-L1                           |
| 26 U6atac-Alu        | 294                 | na               | na                    | 25-125                             | A*                    | U6atac-Alu                          |
| 27 U6atac-L1         | 1262                | 13               | ATCTT-AA              | full length                        | na                    | U6atac-L1                           |
| 28 U6atac-L1         | 1237                | 14               | ATTTT-AA              | full length                        | na                    | U6atac-L1                           |
| 29 U6atac-L1         | 195                 | 12               | TTCTT-AA              | full length                        | na                    | U6atac-L1                           |
| 30 U6atac-Alu        | 311                 | 14               | TCTTT-AT              | full length                        | na                    | U6atac-Alu                          |

**Supplemental Table 1 : Doucet et al.**

| a                                 | Common name <sup>b</sup> | size <sup>c</sup> | coverage <sup>d</sup> | LINE <sup>e</sup> | SINE <sup>f</sup> | LTR retro <sup>g</sup> | DNA trans <sup>h</sup> | others <sup>i</sup> | total <sup>j</sup> | scaffold N50* <sup>k</sup> | Total U6 hits <sup>l</sup> | hits selected <sup>m</sup> | hits with gap <sup>n</sup> |                          |
|-----------------------------------|--------------------------|-------------------|-----------------------|-------------------|-------------------|------------------------|------------------------|---------------------|--------------------|----------------------------|----------------------------|----------------------------|----------------------------|--------------------------|
| <i>Xenopus tropicalis</i>         | Xenopus                  | 1510              | 7X                    | 3,1               | 3,8               | 1,75                   | 25                     | 0,5                 | 34,15              | 124,127,367                | 48                         | 18                         | 0                          | Hellsten et al. 2010     |
| <i>Gallus gallus</i>              | Chicken                  | 1046              | 12X                   | 6,4               | 0,1               | 1,3                    | 0,8                    |                     | 8,6                | 12,877,381                 | 41                         | 4                          | 0                          | Consortium 2004          |
| <i>Meleagris gallopavo</i>        | Turkey                   | 1130              | 35X                   | 4,81              |                   | 0,51                   | 0,65                   | 0,98                | 6,95               | 3,801,642                  | 32                         | 4                          | 1                          | Dalloul et al. 2010      |
| <i>Taeniopygia guttata</i>        | Zebra finch              | 1230              | 5,5X                  | 3,3               | 0,06              | 3,92                   | 0,01                   |                     | 7,29               | 8,236,790                  | 10                         | 3                          | 1                          | Warren et al. 2010       |
| <i>Anolis carolinensis</i>        | Lizard                   | 1800              | 7X                    | 12                | 5                 | 2,9                    | 8,6                    |                     | 28,5               | 4,033,265                  | 192                        | 52                         | 0                          | Alfoldi et al. 2011      |
| <i>Ornithorhynchus anatinus</i>   | Platypus                 | 1995              | 6X                    | 21,04             | 22,43             | 0,15                   | 0,56                   | 0,45                | 44,63              | 958,97                     | 412                        | 70                         | 9                          | Whittington et al. 2010  |
| <i>Sarcophilus harrisii</i>       | Tasmanian devil          | 3170              | 85X                   | nd                | nd                | nd                     | nd                     |                     | nd                 | 1,847,106                  | 297                        | 16                         | 4                          |                          |
| <i>Macropus eugenii</i>           | Wallabi                  | 3075              | 2X                    | 28,6              | 11,7              | 3,9                    | 2,9                    |                     | 47,1               | 36,602                     | 252                        | 7                          | 3                          | Renfree et al. 2011      |
| <i>Monodelphis domestica</i>      | Opossum                  | 3600              | 7X                    | 29,2              | 10,4              | 10,6                   | 1,7                    |                     | 51,9               | 59,809,810                 | 721                        | 16                         | 0                          | Mikkelsen et al. 2007    |
| <i>Choloepus hoffmanni</i>        | Sloth                    | 2460              | 2X                    | nd                | nd                | nd                     | nd                     |                     | nd                 | 366,442                    | 253                        | 15                         | 2                          |                          |
| <i>Dasyus novemcinctus</i>        | Armadillo                | 3630              | 6X                    | nd                | nd                | nd                     | nd                     |                     | nd                 | 1,687,935                  | 604                        | 218                        | 34                         |                          |
| <i>Echinops telfairi</i>          | Tenrec                   | 2950              | 78X                   | nd                | nd                | nd                     | nd                     |                     | nd                 | 45,764,842                 | 263                        | 72                         | 4                          |                          |
| <i>Loxodonta africana</i>         | Elephant                 | 3200              | 7X                    | nd                | nd                | nd                     | nd                     |                     | nd                 | 46,401,353                 | 779                        | 20                         | 2                          |                          |
| <i>Procavia capensis</i>          | Hyrax                    | 3600              | 2X                    | nd                | nd                | nd                     | nd                     |                     | nd                 | 905,827                    | 257                        | 9                          | 2                          |                          |
| <i>Erinaceus europaeus</i>        | Hedgehog                 | 2710              | 79X                   | nd                | nd                | nd                     | nd                     |                     | nd                 | 3,264,618                  | 258                        | 93                         | 11                         |                          |
| <i>Sorex araneus</i>              | Shrew                    | 2420              | 120X                  | nd                | nd                | nd                     | nd                     |                     | nd                 | 22,794,405                 | 274                        | 111                        | 23                         |                          |
| <i>Myotis lucifugus</i>           | Microbat                 | 2030              | 7X                    | nd                | nd                | nd                     | nd                     |                     | nd                 | 4,293,315                  | 918                        | 126                        | 2                          |                          |
| <i>Pteropus vampyrus</i>          | Megabat                  | 2200              | 3X                    | nd                | nd                | nd                     | nd                     |                     | nd                 | 5,954,017                  | 296                        | 9                          | 0                          |                          |
| <i>Equus caballus</i>             | Horse                    | 2470              | 7X                    | 19,56             | 7,46              | 6,27                   | 3,15                   | 11,27               | 47,71              | 46,749,900                 | 416                        | 27                         | 1                          | Petersen et al. 2013     |
| <i>Felis catus</i>                | Cat                      | 2450              | 6X                    | 14,26             | 11,2              | 4,44                   | 2,19                   |                     | 32,09              | 4,658,941                  | 1918                       | 322                        | 21                         | Pontius et al. 2007      |
| <i>Canis familiaris</i>           | Dog                      | 2400              | 7X                    | 18,74             | 10,57             | 3,68                   | 1,98                   |                     | 34,97              | 45,876,610                 | 2849                       | 454                        | 1                          | Lindblad-Toh et al. 2005 |
| <i>Ailuropoda melanoleuca</i>     | Panda                    | 2400              | 2X                    | nd                | nd                | nd                     | nd                     |                     | nd                 | 1,281,781                  | 469                        | 32                         | 4                          |                          |
| <i>Mustela putorius furo</i>      | Ferret                   | 2400              | 162                   | nd                | nd                | nd                     | nd                     |                     | nd                 | 9,335,154                  | 2519                       | 587                        | 12                         |                          |
| <i>Tursiops truncatus</i>         | Dolphin                  | 2550              | 2X                    | nd                | nd                | nd                     | nd                     |                     | nd                 | 116,287                    | 294                        | 43                         | 8                          |                          |
| <i>Sus scrofa</i>                 | Pig                      | 2800              | 24X                   | 18,1              | 13,6              | 4,5                    | 2,2                    |                     | 38,4               | 576,008                    | 905                        | 54                         | 2                          | Fang et al. 2012         |
| <i>Bos taurus</i>                 | Cow                      | 2670              | 9X                    | 23,3              | 17,67             | 3,62                   | 1,96                   |                     | 46,55              | 6,380,747                  | 1099                       | 148                        | 4                          | Elsik et al. 2009        |
| <i>Ovis aries</i>                 | sheep                    | 2600              | 142X                  | nd                | nd                | nd                     | nd                     |                     | nd                 | 100,079,507                | 1085                       | 171                        | 10                         |                          |
| <i>Vicugna pacos</i>              | Alpaca                   | 2170              | 22X                   | nd                | nd                | nd                     | nd                     |                     | nd                 | 7,263,804                  | 310                        | 48                         | 3                          |                          |
| <i>Microcebus murinus</i>         | Mouse lemur              | 2900              | 2X                    | nd                | nd                | nd                     | nd                     |                     | nd                 | 107,020                    | 287                        | 68                         | 5                          |                          |
| <i>Otolemur garnettii</i>         | Bushbaby                 | 2500              | 173X                  | nd                | nd                | nd                     | nd                     |                     | nd                 | 13,852,661                 | 2457                       | 162                        | 22                         |                          |
| <i>Tarsius syrichta</i>           | Tarsier                  | 3200              | 2X                    | nd                | nd                | nd                     | nd                     |                     | nd                 | 10,450                     | 256                        | 21                         | 3                          |                          |
| <i>Callithrix jacchus</i>         | Marmoset                 | 2750              | 6X                    | nd                | nd                | nd                     | nd                     |                     | nd                 | 5,167,444                  | 1963                       | 179                        | 22                         |                          |
| <i>Macaca mulatta</i>             | Macaque                  | 3200              | 4,6X                  | nd                | nd                | nd                     | nd                     |                     | nd                 | 5,874,613                  | 1344                       | 73                         | 6                          |                          |
| <i>Papio anubis</i>               | Olive baboon             | 2950              | 85X                   | nd                | nd                | nd                     | nd                     |                     | nd                 | 528,927                    | 1370                       | 65                         | 5                          |                          |
| <i>Chlorocebus sabaues</i>        | Vervet-AGM               | 2800              | 95X                   | nd                | nd                | nd                     | nd                     |                     | nd                 | 81,825,804                 | 1385                       | 45                         | 0                          |                          |
| <i>Pongo abelii</i>               | Orangutan                | 3400              | 12X                   | nd                | nd                | nd                     | nd                     |                     | nd                 | 747,460                    | 1422                       | 39                         | 7                          |                          |
| <i>Gorilla gorilla</i>            | Gorilla                  | 3050              | 35X                   | nd                | nd                | nd                     | nd                     |                     | nd                 | 913,458                    | 1401                       | 47                         | 12                         |                          |
| <i>Pan troglodytes</i>            | Chimpanzee               | 3300              | 6X                    | nd                | nd                | nd                     | nd                     |                     | nd                 | 8,925,874                  | 1466                       | 50                         | 5                          |                          |
| <i>Homo sapiens</i>               | Human                    | 3209              |                       | 20,42             | 13,29             | 8,29                   | 2,84                   |                     | 44,84              | 67,794,873                 | 1515                       | 55                         | 0                          | Lander et al. 2001       |
| <i>Nomascus leucogenys</i>        | Gibbon                   | 2950              | 15X                   | nd                | nd                | nd                     | nd                     |                     | nd                 | 52,956,880                 | 1455                       | 71                         | 5                          |                          |
| <i>Tupaia belangeri</i>           | Tree shrew               | 3660              | low                   | nd                | nd                | nd                     | nd                     |                     | nd                 | 88,860                     | 279                        | 80                         | 12                         |                          |
| <i>Ochotona princeps</i>          | Pika                     | 2220              | low                   | nd                | nd                | nd                     | nd                     |                     | nd                 | 26,863,993                 | 306                        | 136                        | 13                         |                          |
| <i>Oryctolagus cuniculus</i>      | Rabbit                   | 2730              | 7X                    | nd                | nd                | nd                     | nd                     |                     | nd                 | 35,972,871                 | 1140                       | 181                        | 3                          |                          |
| <i>Cavia porcellus</i>            | Guinea Pig               | 2700              | 7X                    | nd                | nd                | nd                     | nd                     |                     | nd                 | 27,942,054                 | 1416                       | 73                         | 0                          |                          |
| <i>Dipodomys ordii</i>            | Kangaroo rat             | 2200              | 2X                    | nd                | nd                | nd                     | nd                     |                     | nd                 | 11,931,245                 | 276                        | 47                         | 11                         |                          |
| <i>Mus musculus</i>               | Mouse                    | 2800              | 67X                   | 19,21             | 8,22              | 9,87                   | 0,88                   |                     | 38,18              | 52,589,046                 | 904                        | 159                        | 0                          | Waterston et al. 2002    |
| <i>Rattus norvegicus</i>          | Rat                      | 2900              | 6X                    | 23,11             | 7,05              | 9,04                   | 0,81                   |                     | 40,01              | 2,178,346                  | 1010                       | 295                        | 34                         | Gibbs et al. 2004        |
| <i>Ictidomys tridecemlineatus</i> | Squirrel                 | 2480              | 495X                  | nd                | nd                | nd                     | nd                     |                     | nd                 | 8,192,786                  | 829                        | 44                         | 9                          |                          |

**A**

## ProRNAScan : Processed RNA Scan

Paste sequence in FASTA or plain text ([load example](#))

```
>U6
GTGCTCGCTTCGGCAGCACATATACTAAAATTGGAACGATACAGAGAAGA
TTAGCATGGCCCTGCGCAAGGATGACACGCAAAATTCGTGAAGCGTTCCA
TATTTTT
```

Select the databases to search against

myotis\_lucifugus ( Microba...

**Filter**

Min identity

97.5

TSD length

10

Min HSP length

26

Evalue

10

**Output Parameter**

Set the line width for FASTA output

50

**SUBMIT** **RESET**

**B**

## ProRNAScan : Processed RNA Scan

[<< Return to form](#)

Species : Myotis lucifugus

Release : 75

Number of hsp total : 918

Number of hsp with at least 97.5% identity and 26 bp : 126

Number of hsp with at least 97.5% identity and 26 bp and TSD Found : 102

[Download result as fasta file](#)

[Download result as fasta file \(Only To Check\)](#)

[Download result as fasta file \(Only Alone\)](#)

[Download result as fasta file \(Only Repeat\)](#)

[Download result as fasta file \(Only PolyA\)](#)

[Download result as fasta file \(Only 3' truncated\)](#)

[Download result as tab file](#)

[Download result as tab file \(Only TSD\)](#)

[Download result as Excel file](#)

|   | Query Name | Query ID        | Query Start | Query End | Hit Name | Hit Start | Hit End | Strand | Class        | HSP Length | TSD Status    |
|---|------------|-----------------|-------------|-----------|----------|-----------|---------|--------|--------------|------------|---------------|
| 1 | U6         | m_luc_75_U6_003 | 1           | 102       | GL430160 | 822169    | 822280  | -      | PolyA        | 112        | TSD found     |
| 2 | U6         | m_luc_75_U6_005 | 1           | 29        | GL429801 | 7424739   | 7424767 | -      | 3' truncated | 29         | TSD found     |
| 3 | U6         | m_luc_75_U6_002 | 1           | 105       | GL429812 | 6437473   | 6437577 | +      | PolyA        | 105        | TSD found     |
| 4 | U6         | m_luc_75_U6_004 | 1           | 31        | GL429801 | 697877    | 697907  | -      | 3' truncated | 31         | TSD found     |
| 5 | U6         | m_luc_75_U6_001 | 1           | 106       | GL429812 | 965833    | 965938  | -      | PolyA        | 106        | TSD not found |

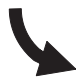

Supplement: supp_msv062_Supplemental_Data_Doucet_et_al.pdf [file supp_msv062_Supplemental_Data_Doucet_et_al.pdf]
